# Supplementary material
Source: Springer Nature journal article supplement (https://www.springermedizin.de/resource/supplementary/12958_2008_507_MOESM2_ESM.pdf/9568170)

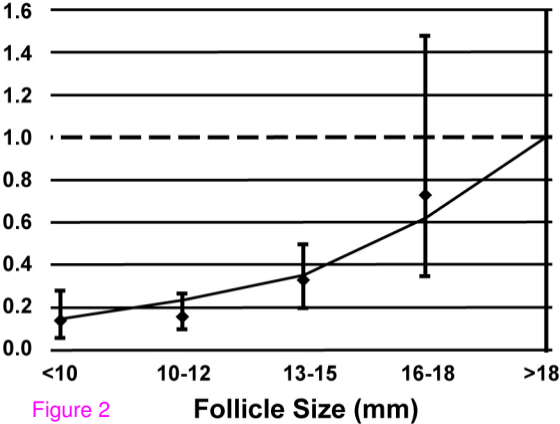

Figure 2

Supplement: MOESM2 [file 9568170]
